## Original Article

# Hepatitis C virus core upregulates the methylation status of the RASSF1A promoter through regulation of SMYD3 in hilar cholangiocarcinoma cells

Ning Guo<sup>1</sup>, Rufu Chen<sup>1\*</sup>, Zhihua Li<sup>2</sup>, Yonggang Liu<sup>2</sup>, Di Cheng<sup>1</sup>, Quanbo Zhou<sup>1</sup>, Jiajia Zhou<sup>1</sup>, and Qing Lin<sup>1</sup>

<sup>1</sup>Department of Hepatobiliary Surgery, Sun Yat-sen Memorial Hospital of Sun Yat-sen University, Guangzhou 510120, China

<sup>2</sup>Department of Oncology, Sun Yat-sen Memorial Hospital of Sun Yat-sen University, Guangzhou 510120, China

\*Correspondence address. Tel: +86-20-81332426; Fax: +86-20-81332426; E-mail: chenrf63@163.com

Increasing evidence has been accumulated indicating the important role of epigenetic regulation in tumor genesis. Previously, we observed that the transfection of hepatitis C virus core (HCVc) protein led to malignant transformation in normal biliary cells, and that tumor suppressor gene *RASSF1A* was downregulated in many hilar cholangiocarcinoma patients by hypermethylation in the promoter region. In the present study, we found SET and MYND domain-containing protein 3 (SMYD3), a novel histone methyltransferase, was overexpressed in cholangiocarcinoma patients especially in those with HCV infection. Transfection of HCVc into hilar cholangiocarcinoma cell lines QBC939 and FRH0201 could upregulate the expression of SMYD3 and promote cell growth, which was consistent with the results of our clinical research. This phenomenon indicated that SMYD3 was related to the epigenetic regulation of cholangiocarcinoma genesis with HCV infection. Overexpression of SMYD3 could inhibit *RASSF1A* expression, whereas inhibition of SMYD3 by siRNA improved its expression. Methylation-specific polymerase chain reaction (MS-PCR) results showed the methylation status of *RASSF1A* promoter was regulated by SMYD3. In conclusion, HCVc could upregulate the methylation status of the *RASSF1A* promoter through regulation of SMYD3, and histone methylation may affect the DNA methylation of downstream gene by an unknown mechanism.

**Keywords** hilar cholangiocarcinoma; HCV; histone methyltransferase; DNA methylation

Received: October 12, 2010 Accepted: December 27, 2010

## Introduction

Hilar cholangiocarcinoma is a common malignant tumor of the bile duct system. The incidence of hilar cholangiocarcinoma grows higher worldwide and the number of hilar

cholangiocarcinoma patients with hepatitis C virus (HCV) infection is continuously increasing [1,2]. The core protein of HCV (HCVc) is a structural protein encoded by the most conservative region of HCV genome, and is considered to play an important role in tumor genesis [3,4]. In our previous research, we found that the transfection of HCVc into normal human biliary epithelial cell line led to the malignant transformation [5]. However, the specific carcinogenic mechanisms are not clear as yet.

The pathogenesis of hilar cholangiocarcinoma is considered as a synergistic multi-gene, multi-step process with the main mechanism of oncogene activation and tumor suppressor inactivation [6]. Recent studies have shown that the phenomena may be related to epigenetic regulation. Approximately 85% of cholangiocarcinomas have at least one methylated tumor suppressor gene [7]. Increasing evidence has shown that histone methylation plays an important role in the occurrence and development of many tumors [8].

A novel histone methyltransferase, SET and MYND domain-containing protein 3 (SMYD3), has been found to be overexpressed in human hepatocellular carcinoma, colorectal carcinoma, and breast cancer cell lines [9–11]. SMYD3 has been reported to play an important role in the transcriptional regulation. By binding to the motif 5'-CCCTCC-3' or 5'-GAGGGG-3' in the promoter region, SMYD3 activates the transcription of a set of downstream genes, including several oncogenes (e.g., *C-Met*, *JUND*, and *Wnt10B*), cell cycle regulatory genes (e.g., *CDK2* and *DNA topoisomerase β*), and signal transduction-related genes (e.g., *RAB40C* and *GNAI2*). Meanwhile, SMYD3 can inhibit the expression of some tumor suppressor genes such as *RIZ1* by epigenetic regulation [9,12–14]. In clinical research, we found that the expression of *SMYD3* may be related to HCV infection in hilar cholangiocarcinoma tissues, which prompted us to investigate the role of SMYD3 in the genesis of hilar cholangiocarcinoma.

The Ras association (RalGDS/AF-6) domain family member 1 (*RASSF1A*) is a common tumor suppressor

gene that was discovered in 2000 [15]. RASSF1A can inhibit cell proliferation, arrest cell cycle, and mediate the RAS-related apoptotic pathway [16,17]. The inactivation of *RASSF1A* is mainly depended on the hypermethylation of specific promoter sequences [18]. The hypermethylation of CpG islands of the promoter area is the main mechanism of inactivation of RASSF1A gene in extrahepatic cholangiocarcinoma [19].

In preliminary experiments, we found that the promoter of *RASSF1A* gene was not methylated in human normal bile duct epithelial cells (BEC) that did not express SMYD3, but it was partially methylated in human hilar cholangiocarcinoma cell line (QBC939) expressing SMYD3, which indicated that the expression of *RASSF1A* promoter may be related to SMYD3. Moreover, *RASSF1A* has the sequence 5'-GAGGGG-3' in its promoter region, which is exactly the SMYD3 binding motif. It was speculated that the expression of SMYD3 may promote the methylation of the promoter of *RASSF1A*. Thus, this study was designed to determine the correlation between HCVc and SMYD3, and the methylation status of the downstream tumor suppressor gene *RASSF1A* in hilar cholangiocarcinoma cells.

## Materials and Methods

### Materials and reagents

The plasmid pcDNA3.1-HCVc (573 bp, genotype 1b) was kindly provided by Prof. Jun Cheng (Ditan Hospital, Beijing, China). Plasmid pGPU6/green fluorescent protein (GFP)/Neo, T-easy vector, and pAAV vector were kindly provided by Prof. Shangwu Wang (Sun yat-sen University, Guangzhou, China). The human hilar cholangiocarcinoma cell line QBC939 was kindly provided by Prof. Shuguang Wang (The Third Military Medical University, Chongqing, China), and the human hilar cholangiocarcinoma cell line FRH0201 was kindly provided by Prof. Xiaopeng Wu (Shandong University, Jinan, China). DNA Gel Extraction Kit and RIPA buffer was obtained from Beyotime (Shanghai, China). Streptavidin–biotin complex (SABC) immunohistochemistry kit was purchased from Boster (Wuhan, China). Cell culture medium and fetal bovine serum were purchased from GIBCO (Carlsbad, USA). The siRNA targeting human SMYD3, the negative control siRNA, and the 5-(and-6)-carboxyfluorescein-labeled siRNA were purchased from GenePharma (Shanghai, China). Transfection-selective drug G418 was purchased from Sigma (St. Louis, USA). Enhanced chemiluminescence (ECL) detection reagent was purchased from Pulilai (Beijing, China). Antibodies against human HCVc and SMYD3 were purchased from Abcam (Cambridge, UK). The transfection reagent Effectene was purchased from Qiagen (Duesseldorf, Germany). The DNA endonuclease was purchased from Ferments (Burlington, Canada) and the

plasmid extract kit I was purchased from Tiangen (Beijing, China).

### Tissue samples

Twenty-two bile duct tissue samples were collected from 22 patients in our hospital from 2005 to 2010. In these cases, seven samples were diagnosed as hilar cholangiocarcinoma with HCV infection, eight samples were diagnosed as hilar cholangiocarcinoma without HCV infection, and other seven samples were normal bile duct tissues (control group). The ethical approval was obtained from our hospital review board and all patients were informed and agreed to participate in our research.

### Immunohistochemistry staining

Tissues were fixed in 10% buffered formalin and embedded in paraffin. Immunohistochemical staining was carried out using the SABC immunohistochemistry kit. One paraffin-embedded block of tissue was selected from each case and cut into 4 µm sections. Deparaffinized sections were treated with methanol containing 3% hydrogen peroxide before conducting antigen retrieval using a microwave oven at 95°C for 5 min, and cooling at room temperature for 10 min for two times. After washing with phosphate-buffered saline (PBS), 5% bovine serum albumin was applied for 10 min. The sections were incubated with anti-SMYD3 antibody (1:75) overnight at 4°C. After washing by PBS, a biotin-conjugated secondary antibody was applied for 20 min followed by SABC treatment for an additional 20 min. DAB chromogenic agent kit (Boster) was used to develop color and the samples were counterstained with hematoxylin. SMYD3 protein expression was then observed with microscope.

### Plasmid construction

To obtain the fluorescent plasmid for flow cytometry and checking transfection efficiency, plasmid pGPU6/GFP/Neo-HCVc was constructed. The HCVc fragment was digested with DNA endonuclease from pcDNA3.1-HCVc and ligated to the plasmid pGPU6/GFP/Neo by endonuclease and T4 ligase following the instructions. Electrophoresis and gene sequencing were performed to confirm that HCVc fragment was inserted successfully to the plasmid.

The sequence of *SMYD3* (NCBI reference No: NM\_022743.1) was retrieved from human cholangiocarcinoma tissue. The PCR primers to amplify *SMYD3* were as following: 5'-CCGCTCGAGATGGAGCCGCTGAAGGTG G-3' (forward), 5'-CCGGAATTCTTAGGCTGCTCTGAT GTTGGCG-3' (reverse). Then fragment was ligated to the plasmid pEGFP-C3 by T4 ligase to construct the plasmid pEGFP-SMYD3 following the instructions and gene

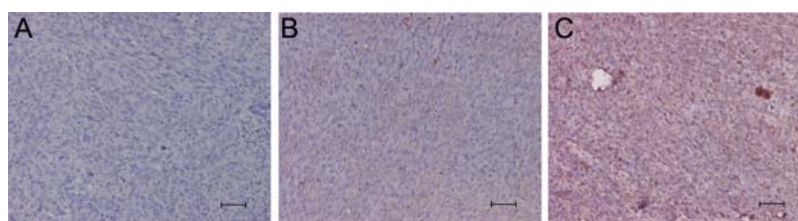

**Figure 1 Immunohistochemistry result of SMYD3 expression in cholangiocarcinoma patients** The SMYD3 expression is nearly negative in normal bile ducts (A), and is much stronger in cholangiocarcinoma patients with HCV infection (C) than those cholangiocarcinoma patients without HCV infection (B). Bar = 50 µm.

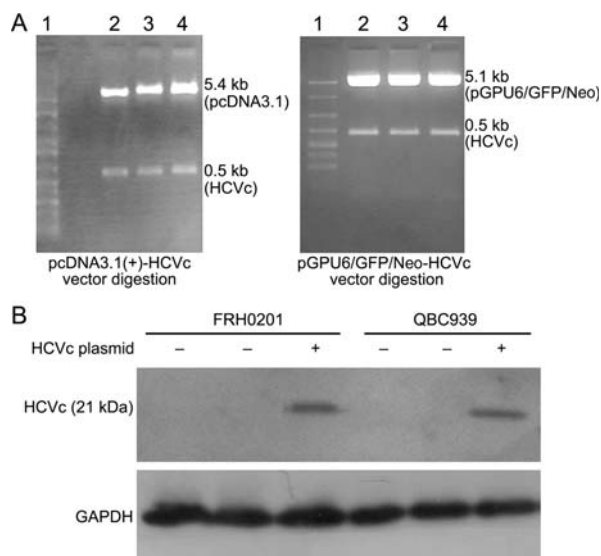

**Figure 2 Fluorescent plasmid construction and generation of stably transfected cell lines** (A) Electrophoresis photo of plasmid digestion. The HCVc fragment (573 bp) digested from pcDNA3.1(+) vector was successfully ligated to the pGPU6/GFP/Neo vector. (B) Western blot of the HCVc protein expression in a transfected cell line. After the transfection of HCVc plasmid, HCVc protein was expressed in both of the cell lines.

sequencing was performed to confirm that SMYD3 fragment was inserted correctly.

### Cell transfection

The plasmid pGPU6/GFP/Neo-HCVc was, respectively, transfected into the FRH0201 and QBC939 cells with Effectene reagent. After 24 h of transfection, the media were changed and G418 was added in each well to a final concentration of 100 µg/ml to screen the monoclonal strain. The monoclonal strain was cultured for 1 month and then transferred into a separate six-well plate containing G418 (250 µg/ml for QBC939 and 200 µg/ml for FRH0201). Cells transfected with empty pGPU6/GFP/Neo plasmid were treated as empty control. The expression of HCVc in the cell lines was analyzed by western blot.

To observe the relationship between *SMYD3* and *RASSF1A*, the plasmid pEGFP-SMYD3 was transiently transfected into the cholangiocarcinoma cell lines to make

an overexpression of SMYD3. siRNA (5'-AACATCTACC AGCTGAAGGTG-3') targeting *SMYD3* was transfected to inhibit SMYD3 expression. Effectene (Qiagen) was used as the transfection reagent. Then, the transfected cells were incubated for 24 h, and the transfection efficiency was examined by flow cytometry.

### CCK-8 assay

Each of the two kinds of cells was divided into three groups: HCVc plasmid transfected group, empty plasmid transfected group, and untransfected group. The cells were cultured in 96-well plates at an initial density of  $1 \times 10^4$  cells/well in 200 µl of growth medium (3 wells for each group) and incubated at 37°C. Once the cells grew into the logarithmic growth phase (pre-experiment showed FRH0201 started at the 11th hour and QBC939 at 14th hour), 20 µl of CCK8 (Dojindo, Kumamoto, Japan) was added. After incubating for 2 h, the absorbance at 630 nm was detected with a MK3 ELISA reader (LabSystem Dragon, Vantaa, Finland) every 2 h.

### Western blot

Total protein was extracted using RIPA buffer with protease inhibitor. The BCA protein assay kit (Beyotime) was used to determine the concentration of protein. Equal amounts (20 µg) of total protein were loaded onto a 10% SDS polyacrylamide gel, and then subsequently transferred to a polyvinylidene fluoride (PVDF) membrane via electroblotting. The membranes were blocked with 5% nonfat milk in tris-HCl buffer and tween (TBST) for 2 h at room temperature and incubated with anti-SMYD3 antibody at the dilution of 1:500 overnight at 4°C. After washing with TBST buffer for three times (10 min each time), the PVDF membranes were incubated with horseradish-peroxidase-conjugated anti-rabbit IgG (1:4000) for 2 h at room temperature. ECL detection reagent was used to detect the bands. GAPDH (glyceraldehyde-3-phosphate dehydrogenase) was used as a control. Image analysis was performed by IMAGEJ plus.

### Quantitative real-time PCR

After transfection for 24 h, RNA was extracted by RNAiso plus (TaKaRa, Dalian, China) and the RT reaction was



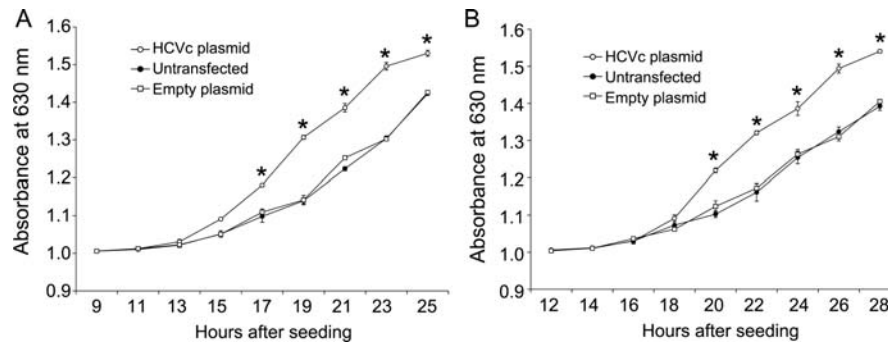

**Figure 3** Determination of cells growth curve of FRH0201 cells (A) and QBC939 cells (B) after HCVc transfection by CCK-8 assay \* $P < 0.05$  compared with untransfected or empty plasmid transfected group.

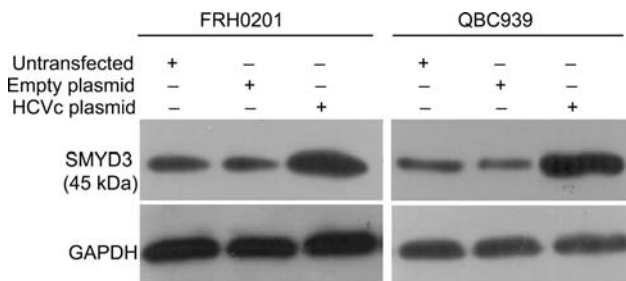

**Figure 4** Detection of SMYD3 expression after HCVc plasmid transfection Western blot analysis was performed to detect SMYD3 expression after transfection of SMYD3 in the cholangiocarcinoma cell lines FRH0201 and QBC939. The expression of SMYD3 is upregulated by 89.31% in FRH0201 and 98.12% in QBC939 cells in the HCVc transfected group compared with the empty plasmid transfected group or the no treatment group. GAPDH was used as a control.

performed using TaKaRa RT reagent kit. The products were run on a Roche LC480 instrument with the SYBR Premix Ex Taq. The reaction was performed as described by the manufacturer protocol. A negative control without cDNA was used to detect possible contamination. The Q-PCR reaction proceeded as follows: 95°C for 30 s, then 40 cycles including 90°C for 30 s, and 60°C for 30 s. The PCR results were analyzed by LC-480. Sequences of the *SMYD3* real-time primers were as follows: forward, 5'-GGCAGAGA ACACAGCCTGAT-3'; reverse, 5'-ACACGCCGTATTTT CCTCT-3'.  $\beta$ -Actin (forward, 5'-TGGCACCCAGCACA ATGAA-3'; reverse, 5'-CTAAGTCATAGTCCGCCT AGA AGCA-3') was used as internal control.

### RT-PCR

The total RNA of the cells was extracted using RNAiso plus and RT-PCR was performed using RNA-PCR kit (Takara) following the manuals. The primers of *RASSF1A* (280 bp) were as following: sense, 5'-GGCGTCGTGC GCAAAGGCC-3'; anti-sense, 5'-GAACCTTGATGAA GCCTGTG-3'.  $\beta$ -Actin (416 bp) was used as the internal control and the primers for  $\beta$ -actin were 5'-GAGCTAC GAGCTGCCTGACG-3' (sense) and 5'-CCTAGAAGCA

TTTGCGGTGG-3' (anti-sense). The annealing temperature for *RASSF1A* was 60°C and for  $\beta$ -actin was 58°C. The PCR reaction was proceeded as follows: 95°C for 30 s, then 30 cycles including 95°C for 30 s, 60°C (for *RASSF1A*)/58°C (for  $\beta$ -actin) for 30 s, and 72°C for 1 min. Total RNA from normal biliary duct tissue was used as a control. The result was checked by 2% agarose gel electrophoresis.

### Methylation-specific polymerase chain reaction (MS-PCR)

The methylation status in the *RASSF1A* promoter region was detected by MS-PCR using MethylDetector Kit (Active-Motif, Carlsbad, USA) according to the manufacturer's protocol. To amplify the bisulfate-converted *RASSF1A* promoter sequences, the methylated (M) and unmethylated (U) primers were designed according to our previously published protocol [20] and were listed as follows: *RASSF1A-M* (sense): 5'-GGGTTTTGCGAGAG CGCG-3'; *RASSF1A-M* (anti-sense): 5'-GCTAACAAAC GCGAACCG-3'; *RASSF1A-U* (sense): 5'-GGTTTTGTG AGAGTGTGTTAG-3'; and *RASSF1A-U* (anti-sense): 5'-CACTAACAAACACAAACCAAAC-3'. The anneal temperature for *RASSF1A-M* primer is 64°C and for *RASSF1A-U* primer is 59°C. Both the products' length is 169 bp.

## Results

### SMYD3 expression in cholangiocarcinoma patients

The results showed that the SMYD3 positive expression rate was 0 (zero of seven) in the normal bile ducts [Fig. 1(A)], 25% (two of eight) in the hilar cholangiocarcinoma tissues without HCV infection [Fig. 1(B)], and 85.71% (six of seven) in the hilar cholangiocarcinoma tissues with HCV infection [Fig. 1(C)]. This phenomenon indicated that SMYD3 might express highly in the hilar cholangiocarcinoma tissues.

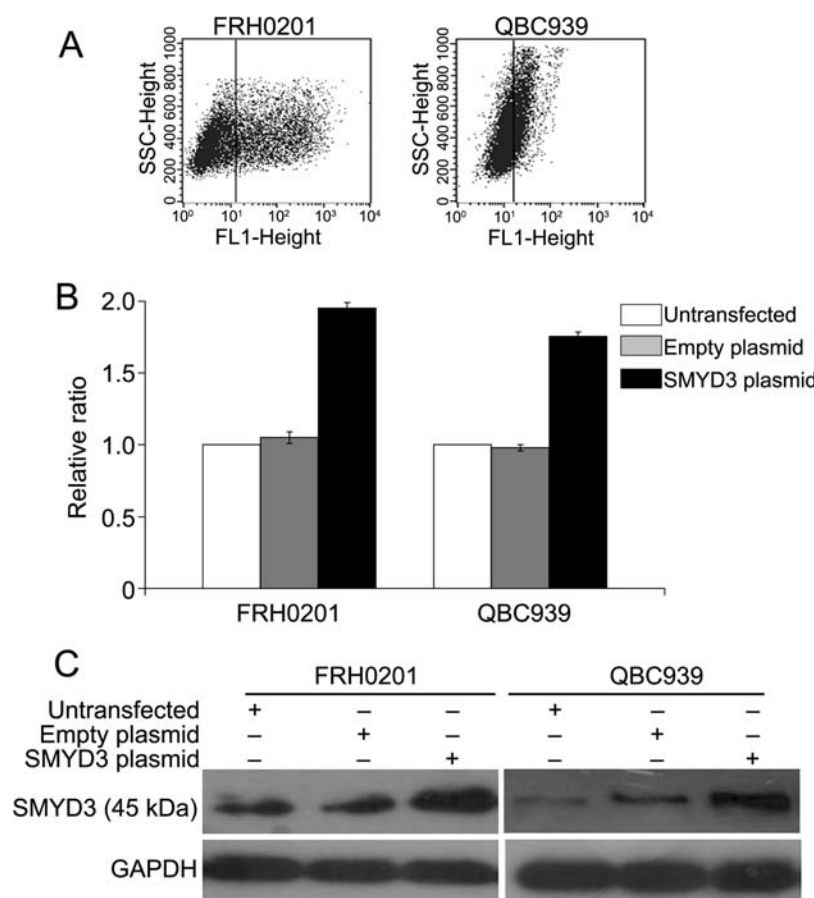

**Figure 5 Upregulation of SMYD expression by pEGFP-SMYD3 transfection** (A) The transfection efficiency of pEGFP-SMYD3 in FRH0201 and QBC939 cells was detected by flow cytometry. In FRH0201 cells, transfection efficiency was 40.97%, and 45.56% in QBC939 cells. (B) The effect of pEGFP-SMYD3 transfection on *SMYD3* mRNA expression was detected by real-time PCR. The level of *SMYD3* mRNA was upregulated by  $95.16\% \pm 3.93\%$  in FRH0201 cells, and by  $75.56\% \pm 3.15\%$  in QBC939 cells. (C) The effect of pEGFP-SMYD3 transfection on SMYD3 protein expression was detected by western blot. GAPDH was used as a control. The SMYD3 expression is up regulated by 90.72% and 67.83% in FRH0201 cells and QBC939 cells, respectively.

### Generation of stably transfected cell lines

The electrophoresis image showed the HCVc was correctly inserted into the pGPU6/GFP/Neo plasmid [Fig. 2(A)]. Sequencing result showed that the direction of transcription was correct. Western blot showed that HCVc protein expression was found in HCVc plasmid transfected group, not in the empty group or the untreated groups [Fig. 2(B)].

### Measurement of cell growth

Figure 3(A) showed the growth curve of FRH0201 cells transfected with HCVc plasmid, empty plasmid, and the untransfected cell. Figure 3(B) represents the growth curve of QBC939. SPSS 16.0 was used for variance analysis. As suggested in the results, the transfected FRH0201-HCVc and QBC939-HCVc cell lines grew faster than the non-transfected cell lines ( $P < 0.05$ ), but no significant difference for the growth was observed between empty plasmid transfected group and untransfected group in FRH0201 and QBC939 cells.

### HCV transfection promoted SMYD3 expression

The western blot for SMYD3 expression is shown in Fig. 4. The expression of SMYD3 was upregulated by 89.31% in FRH0201 cells and by 98.12% in QBC939 cells after HCVc transfection, which was higher than those in the empty group and untransfected group.

### Upregulation of SMYD expression by pEGFP-SMYD3 transfection

The transfection efficiency of pEGFP-SMYD3 was 40.97% for FRH0201 cells and 45.56% for QBC939 cells [Fig. 5(A)]. Real-time PCR results showed the level of *SMYD3* mRNA was upregulated by  $95.16\% \pm 3.93\%$  and  $75.56\% \pm 3.15\%$  in FRH0201 and QBC939 cells compared with the untransfected cells, respectively [Fig. 5(B)]. Western blot showed that the level of SMYD3 protein was upregulated by 90.72% in FRH0201 and by 67.83% in QBC939 cell lines compared with the untransfected cells [Fig. 5(C)].

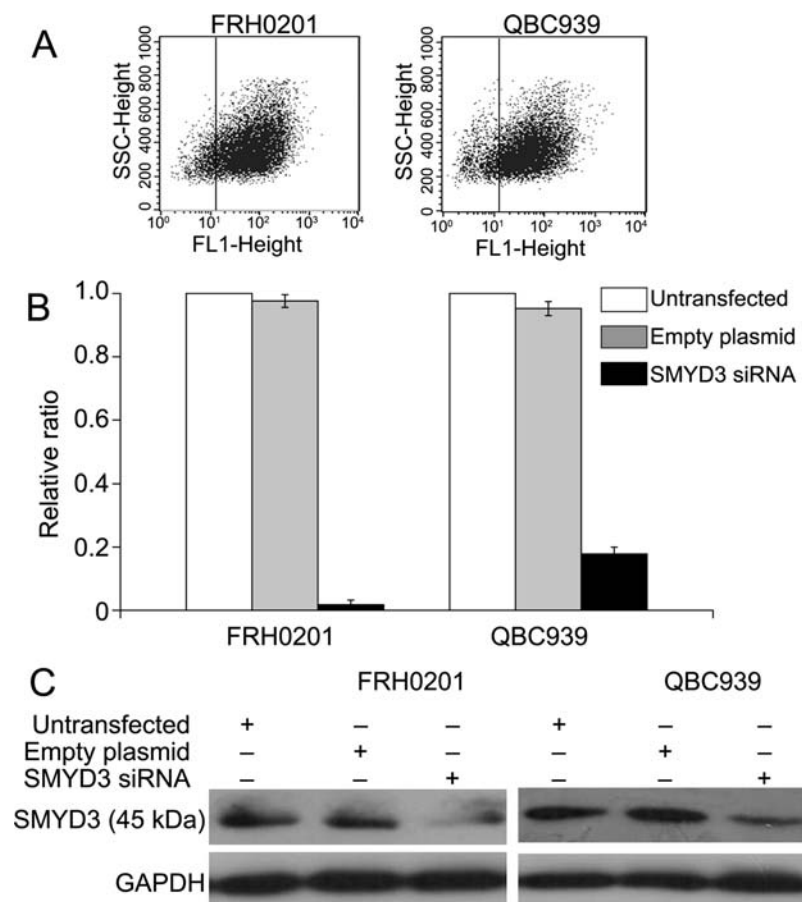

**Figure 6 Downregulation of SMYD3 expression by siRNA silencing** (A) siRNA targeting *SMYD3* was transfected in FRH0201 and QBC939 cells using Effectene. The cells were incubated for 24 h. Transfection efficiency was analyzed by flow cytometry. The transfection efficiency was 89.98% in FRH0201 and 85.23% in QBC939. (B) The expression of *SMYD3* mRNA by *SMYD3* siRNA knockdown was examined by real-time PCR. After transfection of siRNA, the mRNA of *SMYD3* was downregulated by  $98.23\% \pm 1.47\%$  in FRH0201, and downregulated by  $82.18\% \pm 2.16\%$  in QBC939 cells. (C) The expression of SMYD3 protein after siRNA transfection was checked by western blot. The results showed siRNA transfection resulted in downregulation of SMYD3 protein by 88.71% in FRH0201 cells and by 47.83% in QBC939 cells.

### Downregulation of SMYD3 expression by siRNA transfection

The siRNA transfection efficiency was 89.98% in FRH0201 cells and 85.23% in QBC939 [Fig. 6(A)]. Real-time PCR results showed that the level of *SMYD3* mRNA was downregulated by  $98.23\% \pm 1.47\%$  in FRH0201 cells, and by  $82.18\% \pm 2.16\%$  in QBC939 cells compared with the untransfected cells [Fig. 6(B)]. The level of SMYD3 protein was downregulated by 88.71% in FRH0201 cells and 47.83% in QBC939 cells compared with the untransfected cells [Fig. 6(C)].

### Detection of *RASSF1A* expression after *SMYD3* gene knockdown

RT-PCR results showed that the expression of *RASSF1A* in both of hilar cholangiocarcinoma cell lines was much lower (32.73% for FRH0201 and 47.63% for QBC939) than in the normal biliary cells (Fig. 7). *SMYD3* knockdown resulted in the upregulation of *RASSF1A* in FRH0201 (87.52%) and QBC939 (61.81%) cells. On the

contrary, the overexpression of SMYD3 significantly inhibited the expression of *RASSF1A*.

### Detection of the methylation situation of *RASSF1A* promoter by MS-PCR

As shown in Fig. 8, histone methyltransferase SMYD3 could affect the methylation situation of *RASSF1A*. Overexpression of SMYD3 could increase DNA methylation level, whereas SMYD3 inhibition caused it to decrease. This phenomenon indicated that SMYD3 expression was possibly associated with the methylation level of *RASSF1A* promoter by some unknown mechanism.

### Discussion

According to the immunohistochemistry results of the clinical samples, we speculated that SMYD3 was correlated with HCVc expression in hilar cholangiocarcinoma cell lines. Our experiments *in vitro* provided more evidence of the relationship between HCVc and SMYD3. In our study,

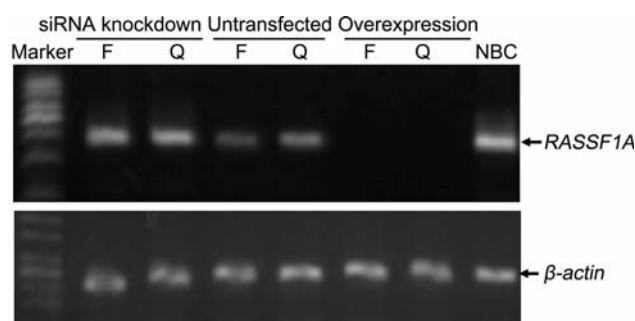

**Figure 7 RT-PCR detection of *RASSF1A* mRNA expression after regulation of *SMYD3*** The expression of *RASSF1A* mRNA in hilar cholangiocarcinoma cell lines was much lower than normal biliary cell (NBC) group (32.73% in FRH0201 cells and 47.63% in QBC939 cells of the NBC group). The results showed *SMYD3* siRNA knockdown resulted in upregulation of *RASSF1A* by 87.52% in FRH0201 cells (F) and 61.81% in QBC939 cells (Q). On the contrary, when *SMYD3* was overexpressed, the mRNA of *RASSF1A* was hardly detected in both of the cholangiocarcinoma cell lines.

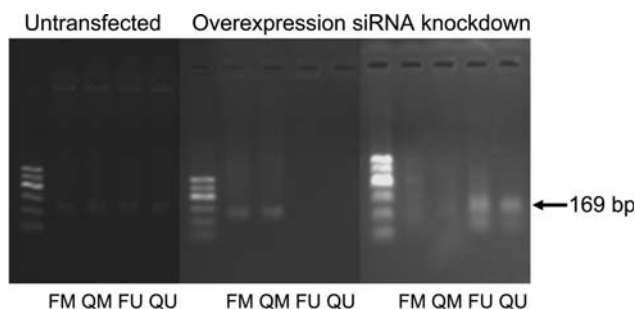

**Figure 8 MS-PCR detection of the methylation situation of *RASSF1A* promoter after regulation of *SMYD3*** Compared with the methylation situation of *RASSF1A* in the untransfected cell lines, the overexpression of *SMYD3* increased the degree of methylation of *RASSF1A* promoter, while knockdown of *SMYD3* by siRNA reversed the situation. FM, FRH0201 methylated group; QM, QBC939 methylated group; FU, FRH0201 unmethylated group; QU, QBC939 unmethylated group.

we found that the growth speed of the hilar cholangiocarcinoma cell lines was improved, and the expression of *SMYD3* was increased after HCVc transfection in cholangiocarcinoma cell lines QBC939 and FRH0201. This phenomenon indicated that the expression of *SMYD3* was related to HCVc transfection, and might play an important role in the tumor genesis of hilar cholangiocarcinoma. We speculated that HCVc may be the initiation factor of *SMYD3*, whereas *SMYD3* might relate to either activation of some oncogene or inactivation of tumor suppressor gene.

Previously we found that the promoter of tumor suppressor gene *RASSF1A* was methylated in 58.33% cases of hilar cholangiocarcinoma patients [21]. The application of the DNA methyltransferase inhibitor 5-*N*-2'-deoxycytidine on

the bile duct cell line can induce re-expression of this gene and inhibit cholangiocarcinoma cell growth [22]. As we know, DNA methylation, especially promoter region CpG island hypermethylation, is a common cause of inactivation for many tumor suppressor genes [23], and the inactivation of *RASSF1A* is mainly through this mechanism [24]. We deduced the inactivation of *RASSF1A* was also resulted by epigenetic modification of hypermethylation in hilar cholangiocarcinoma.

In this study, we found that the expression of *RASSF1A* was lower in the cholangiocarcinoma cells than in normal biliary duct cells. The expression of *RASSF1A* was increased when siRNA was used to disturb the expression of *SMYD3*, whereas it was decreased by overexpression of *SMYD3*. Then MS-PCR was performed to check the *RASSF1A* gene promoter methylation status. The results showed that the methylation status of the *RASSF1A* gene promoter in the hilar cholangiocarcinoma cell lines QBC939 and FRH0201 was positively correlated with the expression levels of *SMYD3*. Thus, we speculated that *SMYD3* could affect the methylation situation of *RASSF1A* promoter, and regulate the expression of *RASSF1A*.

Both histone methylation and DNA methylation are very important for regulating the expression of multiple genes in many types of tumors. However, only in recent years, the links between the two processes have been gradually revealed. In 2001, Tamaru and Selker found that the mutation of both of the widely distributed and conserved Su(var)-like methyltransferase and histone H3K9 tyrosine can lead to the loss of DNA methylation, implying that histone methylation may be a prerequisite for DNA methylation [25]. The results of our study showed that the methylation situation of *RASSF1A* was positively related to the expression of *SMYD3*.

In conclusion, epigenetic changes in hilar cholangiocarcinoma cell line suggested that HCVc infection increases the risks of hilar cholangiocarcinoma by promoting the methylation of the promoter of *RASSF1A* through upregulation of HMTase *SMYD3*. Epigenetic regulation plays an important role in the process of the HCVc-*SMYD3*-*RASSF1A* pathway in hilar cholangiocarcinoma, and histone methylation may affect DNA methylation of the downstream gene. However, the specific mechanism still needs further investigation.

## Acknowledgements

We are very grateful to all colleagues at the Department of General Surgery and Department of Oncology of Sun Yat-sen Memorial Hospital of Sun Yat-sen University for their cooperation in our experiments.



## Funding

This work was supported by a grant from the National Natural Science Foundation of China (30872485).

## References

- 1 Welzel TM, Graubard BI, El-Serag HB, Shaib YH, Hsing AW, Davila JA and McGlynn KA. Risk factors for intrahepatic and extrahepatic cholangiocarcinoma in the United States: a population-based case-control study. *Clin Gastroenterol Hepatol* 2007, 5: 1221–1228.
- 2 Suriawinata A and Thung SN. Hepatitis C virus and malignancy. *Hepatol Res* 2007, 37: 397–401.
- 3 Yamamoto S, Kubo S, Hai S, Uenishi T, Yamamoto T, Shuto T and Takemura S, *et al.* Hepatitis C virus infection as a likely etiology of intrahepatic cholangiocarcinoma. *Cancer Sci* 2004, 95: 592–595.
- 4 Chen RF, Li ZH, Liu RY, Kong XH, Tang QB and Wang J. Malignant transformation of the cultured human normal biliary tract epithelial cells induced by hepatitis C virus core protein. *Oncol Rep* 2007, 17: 105–110.
- 5 Li ZH, Tang QB, Wang J, Zhou L, Huang WL, Liu RY and Chen RF. HCV core protein induces malignant transformation of biliary epithelial cells by activating NF- $\kappa$ B pathway. *J Gastroenterol Hepatol* 2010, 25: 1315–1320.
- 6 Nasimuzzaman M, Waris G, Mikolon D, Stupack DG and Siddiqui A. Hepatitis C virus stabilizes hypoxia-inducible factor 1 $\alpha$  and stimulates the synthesis of vascular endothelial growth factor. *J Virol* 2007, 81: 10249–10257.
- 7 Yang B, House MG, Guo M, Herman JG and Clark DP. Promoter methylation profiles of tumor suppressor genes in intrahepatic and extrahepatic cholangio-carcinoma. *Mod Pathol* 2005, 18: 412–420.
- 8 Schneider R, Bannister AJ and Kouzarides T. Unsafe SETs: histone lysine methyltransferases and cancer. *Trends Biochem Sci* 2002, 27: 396–402.
- 9 Hamamoto R, Furukawa Y, Morita M, Iimura Y, Silva FP, Li M and Yagyu R, *et al.* SMYD3 encodes a histone methyltransferase involved in the proliferation of cancer cells. *Nat Cell Biol* 2004, 6: 731–740.
- 10 Sims RJ and Reinberg D. From chromatin to cancer: a new histone lysine methyltransferase enters the mix. *Nat Cell Biol* 2004, 6: 685–687.
- 11 Hamamoto R, Silva FP, Tsuge M, Nishidate T, Katagiri T, Nakamura Y and Furukawa Y. Enhanced SMYD3 expression is essential for the growth of breast cancer cells. *Cancer Sci* 2006, 97: 113–118.
- 12 Chen LB, Xu JY, Yang Z and Wang GB. Silencing SMYD3 in hepatoma demethylates RIZ1 promoter induces apoptosis and inhibits cell proliferation and migration. *World J Gastroenterol* 2007, 43: 5718–5724.
- 13 Zou JN, Wang SZ, Yang JS, Luo XG, Xie JH and Xi T. Knockdown of SMYD3 by RNA interference down-regulates c-Met expression and inhibits cells migration and invasion induced by HGF. *Cancer Lett* 2009, 280: 78–85.
- 14 Tsuge M, Hamamoto R, Silva FP, Ohnishi Y, Chayama K, Kamatani N and Furukawa Y, *et al.* A variable number of tandem repeats polymorphism in an E2F-1 binding element in the 5' flanking region of SMYD3 is a risk factor for human cancers. *Nat Genet* 2005, 37: 1104–1107.
- 15 Dammann R, Li C, Yoon JH, Chin PL, Bates S and Pfeifer GP. Epigenetic inactivation of a RAS association domain family protein from the lung tumour suppressor locus 3p21.3. *Nat Genet* 2000, 25: 315–319.
- 16 Shivakumar L, Minna J, Sakamaki T, Pestell R and White MA. The RASSF1A tumor suppressor blocks cell cycle progression and inhibits cyclin D1 accumulation. *Mol Cell Biol* 2002, 22: 4309–4318.
- 17 Ortiz-Vega S, Khokhlatchev A, Nedwidek M, Zhang XF, Dammann R, Pfeifer GP and Avruch J. The putative tumor suppressor RASSF1A homodimerizes and heterodimerizes with the Ras-GTP binding protein Nore1. *Oncogene* 2002, 21: 1381–1390.
- 18 Kee SK, Lee JY, Kim MJ, Lee SM, Jung YW, Kim YJ and Park JY, *et al.* Hypermethylation of the Ras association domain family 1A (RASSF1A) gene in gallbladder cancer. *Mol Cells* 2007, 24: 364–371.
- 19 Chen YJ, Tang QB and Zou SQ. The research of RASSF1A gene in extrahepatic cholangiocarcinoma transcription and its clinical significance. *Zhong Hua Gan Dan Wai Ke Za Zhi* 2005, 11: 107–109.
- 20 Zuo S, Chen Y, Xu L, Tang Q and Zou S. Re-expression of RASSF1A by 5-Aza-CdR induced demethylation of the promoter region in human biliary tract carcinoma cells. *J Huazhong Univ Sci Technolog Med Sci* 2007, 27: 281–284.
- 21 Chen YJ, Tang QB and Zou SQ. The research of sporadic extrahepatic cholangiocarcinoma RASSF1A gene promoter methylation status. *Zhong Hua Shi Yan Wai Ke Za Zhi* 2004, 21: 1430–1432.
- 22 Tang QB, Sun HW and Zhou SQ. Inhibitory effect of methylation inhibitor 5-aza-2-deoxycytidine on bile duct cancer cell line in vivo and in vitro. *Hepatobiliary Pancreat Dis Int* 2004, 3: 124–128.
- 23 Yoo CB and Jones PA. Epigenetic therapy of cancer: past, present and future. *Nat Rev Drug Discov* 2006, 5: 37–50.
- 24 Donninger H, Vos MD and Clark GJ. The RASSF1A tumor suppressor. *J Cell Sci* 2007, 120: 3163–3172.
- 25 Tamaru H and Selker EU. A histone H3 methyltransferase controls DNA methylation in *Neurospora crassa*. *Nature* 2001, 414: 277–283.
